# Supplementary material for: Luminescent imidazolium carboxylate supported aggregate and infinite coordination networks of copper and zinc
Source: Royal Society of Chemistry journal article supplement (doi:10.1039/c3dt50675d), 2013-01-01

## Supporting Information

**Fig 1.**  $^1\text{H}$  NMR spectrum of compound **2** in DMSO- $\text{d}_6$  at RT.

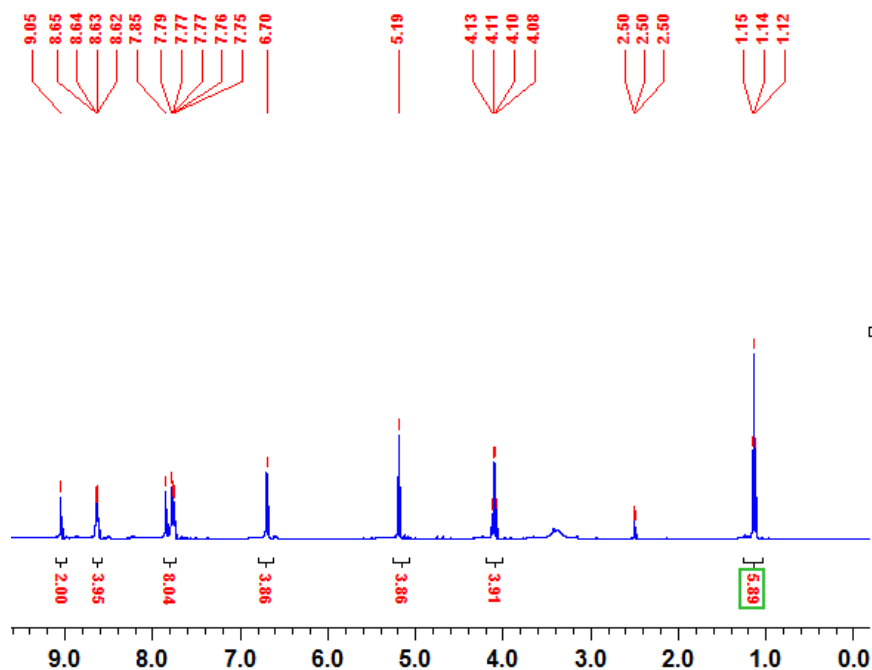

**Fig 2.**  $^{13}\text{C}$  NMR spectrum of compound **2** in DMSO- $\text{d}_6$  at RT

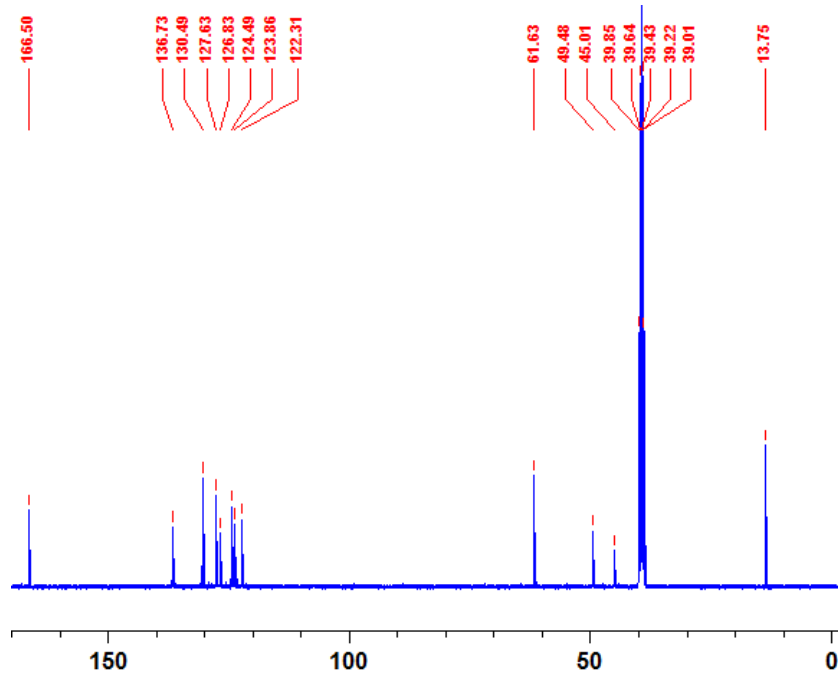

**Fig 3.**  $^1\text{H}$  NMR spectrum of compound **3** in  $\text{D}_2\text{O}$  at RT.

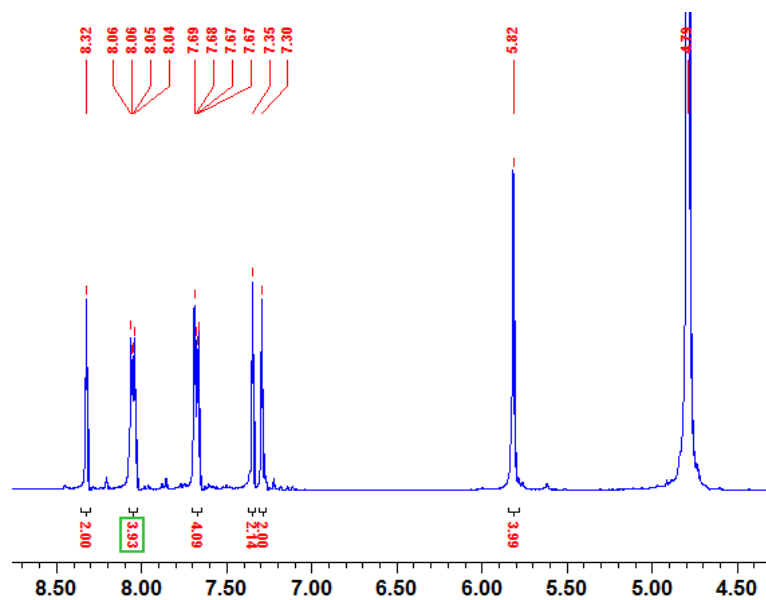

**Fig 4.**  $^{13}\text{C}$  NMR spectrum of compound **3** in  $\text{D}_2\text{O}$  at RT.

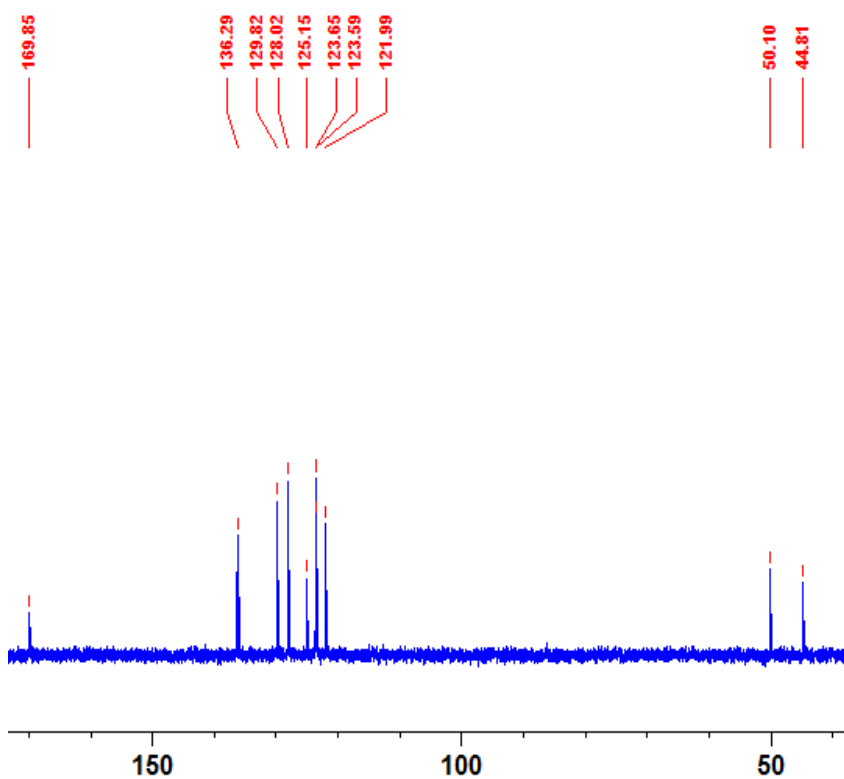

**Fig 5.**  $^1\text{H}$  NMR spectrum of compound **4** in  $\text{D}_2\text{O}$  at RT.

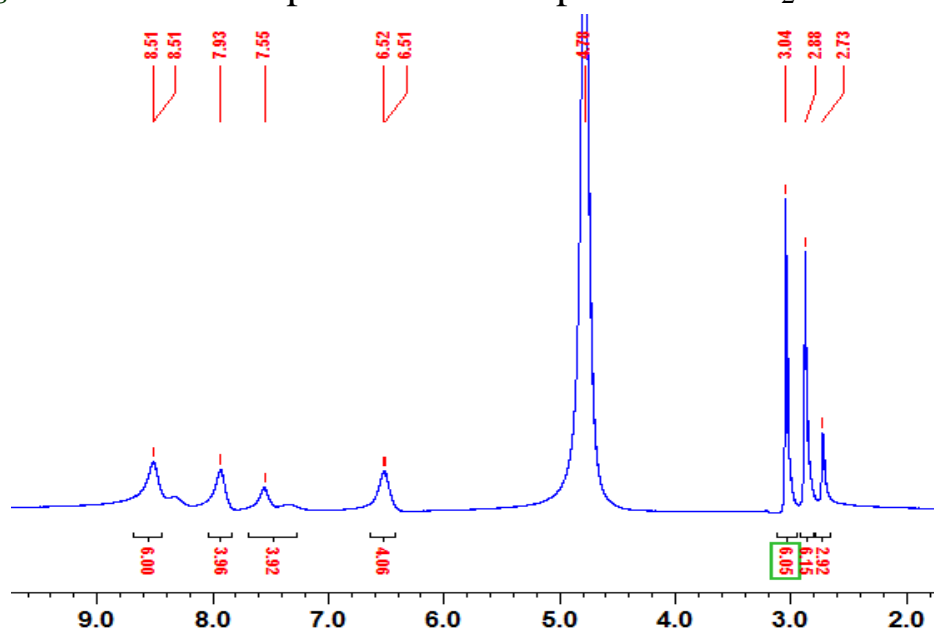

**Fig 6.**  $^{13}\text{C}$  NMR spectrum of compound **4** in  $\text{D}_2\text{O}$  at RT.

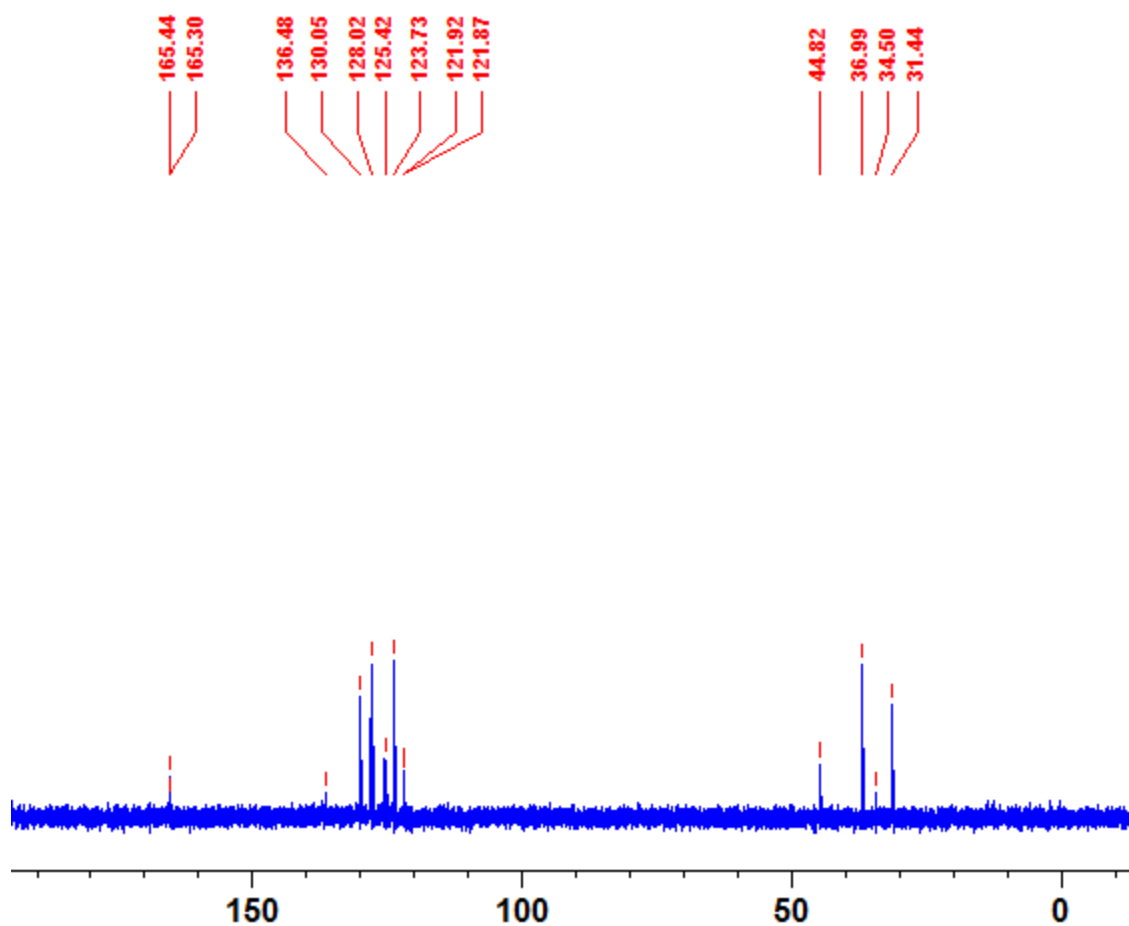

**Fig 7.**  $^1\text{H}$  NMR spectrum of compound **5** in  $\text{D}_2\text{O}$  and  $\text{DMSO-d}_6$  at RT.

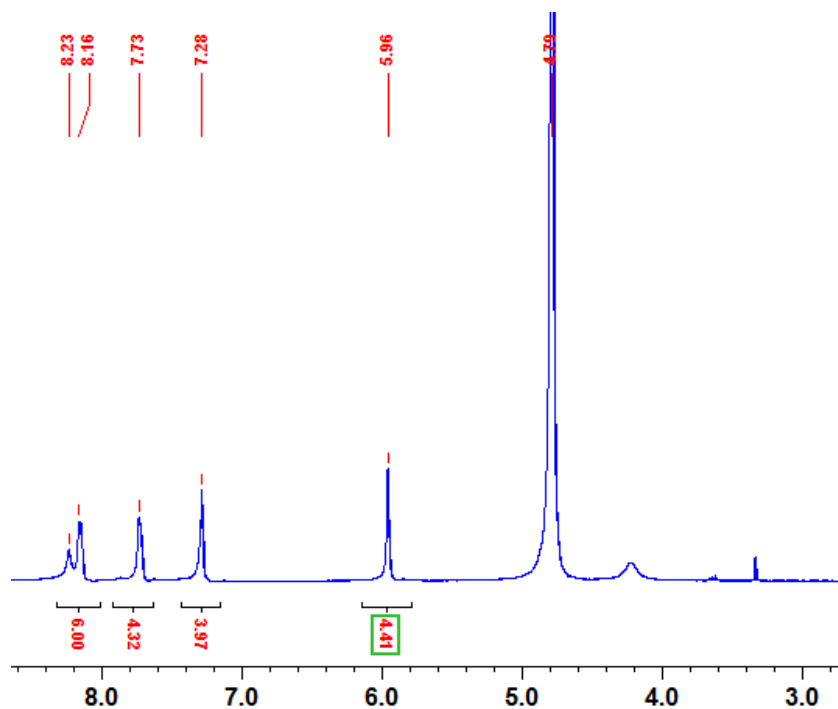

**Fig 8.**  $^{13}\text{C}$  NMR spectrum of compound **5** in  $\text{D}_2\text{O}$  and  $\text{DMSO-d}_6$  at RT.

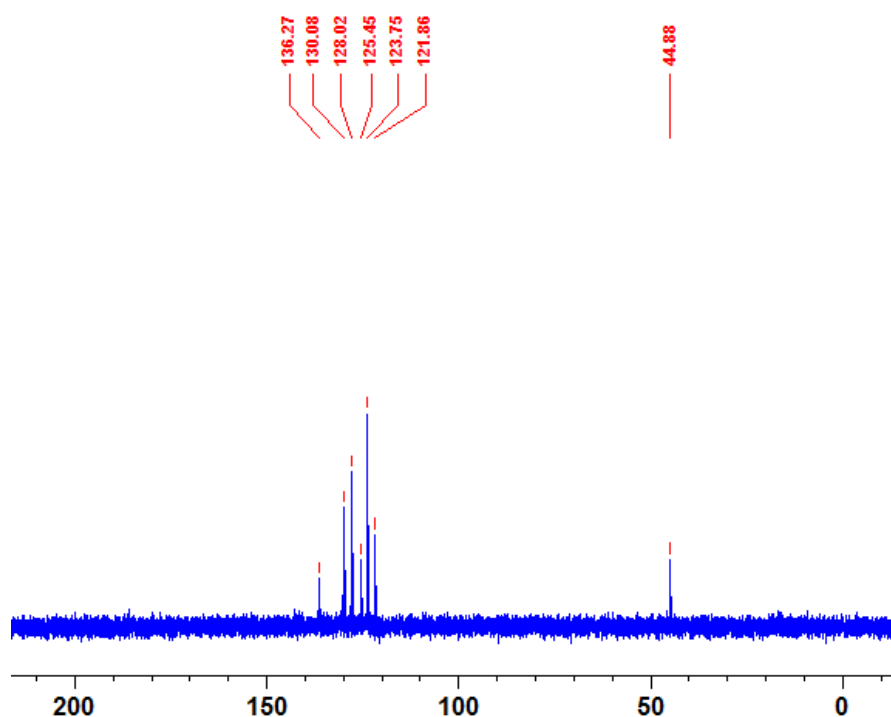

**Fig 9.**  $^1\text{H}$  NMR spectrum of compound **6** in  $\text{D}_2\text{O}$  at RT.

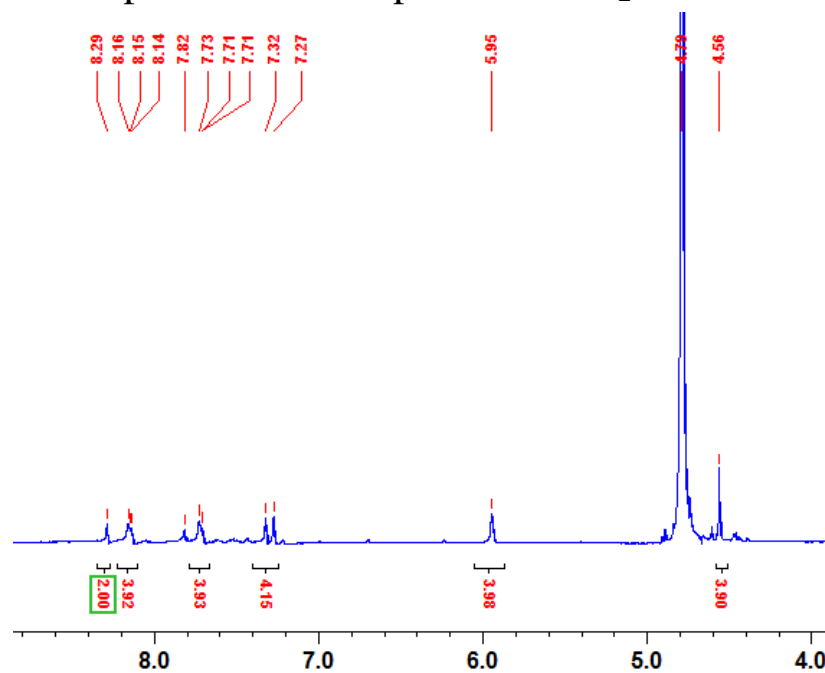

**Fig 10.**  $^{13}\text{C}$  NMR spectrum of compound **6** in  $\text{D}_2\text{O}$  at RT.

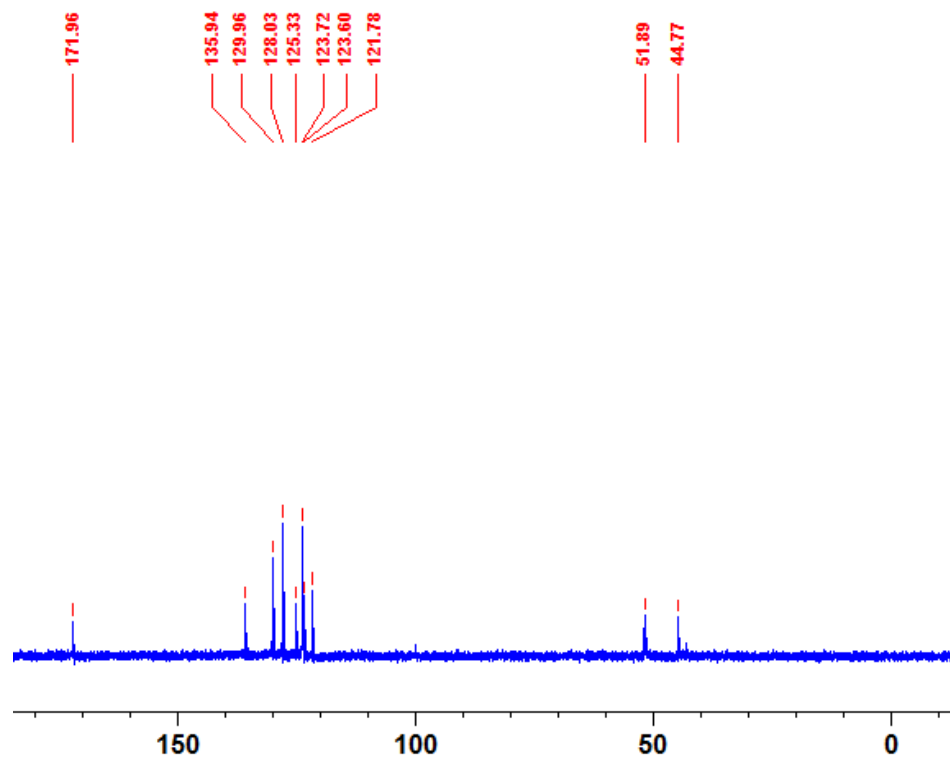

Supplement: c3dt50675d.pdf [file c3dt50675d.pdf]
